# Supplementary material for: Facile synthesis of self-supported Mn3O4@C nanotube arrays constituting an ultrastable and high-rate anode for flexible Li-ion batteries
Source: Royal Society of Chemistry journal article supplement (doi:10.1039/c7ta01698k), 2017-01-01
Supplement: c7ta01698k1.pdf [file c7ta01698k1.pdf]

## Supplementary Information

### **Facile Synthesis of Self-Supported Mn<sub>3</sub>O<sub>4</sub>@C Nanotube Arrays Constituting an Ultrastable and High-Rate Anode for Flexible Li- Ion Batteries**

*Bin Lu<sup>a,b</sup>, Jun Liu<sup>a,b</sup>, Renzong Hu<sup>a,b</sup>, Hui Wang<sup>a,b</sup>, Jiangwen Liu<sup>a,b</sup>, Min Zhu<sup>a,b,\*</sup>*

<sup>a</sup>School of Materials Science and Engineering, Key Laboratory of Advanced Energy Storage Materials of Guangdong Province, South China University of Technology, Guangzhou, 510641, China

<sup>b</sup>China-Australia Joint Laboratory for Energy & Environmental Materials, South China University of Technology, Guangzhou, 510641, China

\* Corresponding author

E-mail address: memzhu@scut.edu.cn

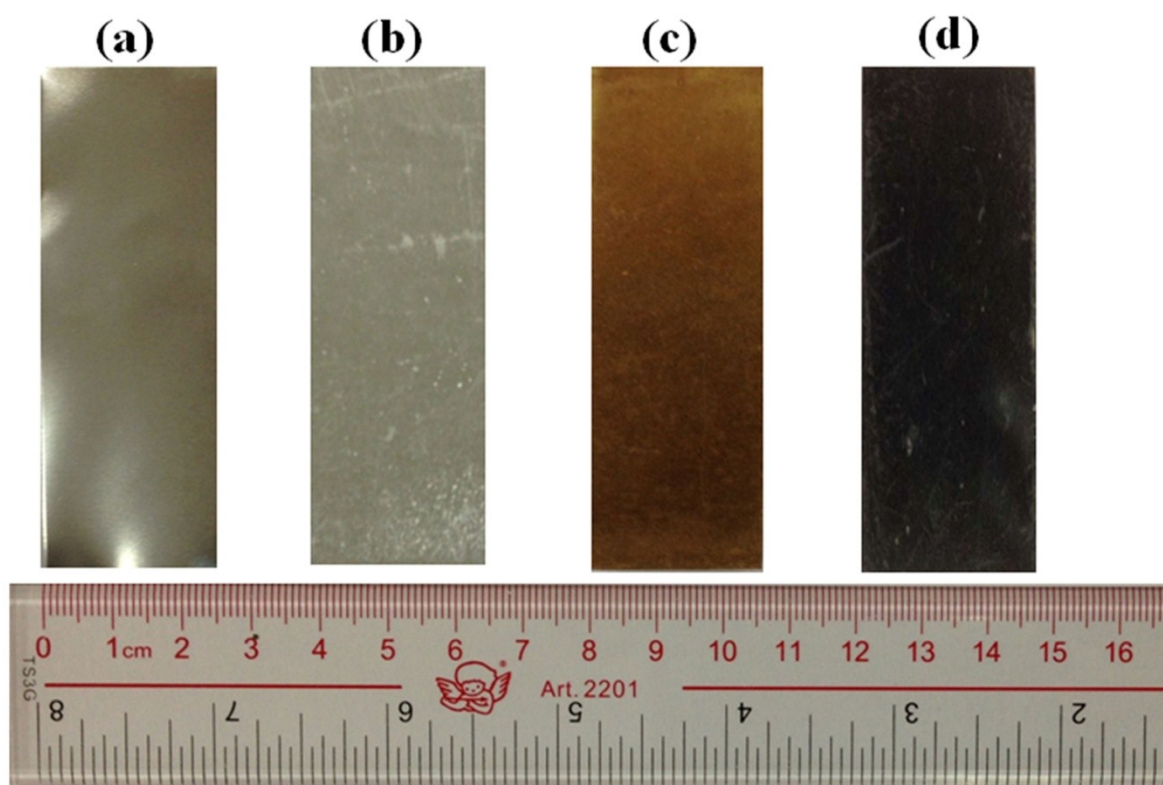

**Figure S1.** Optical photographs of pure stainless steel foil (a), stainless steel foil grown with ZnO nanorod arrays (NRAs) (b), stainless steel foil grown with ZnO@MnO<sub>2</sub> NRAs (c), and stainless steel foil grown with Mn<sub>3</sub>O<sub>4</sub>@C nanotube arrays (d).

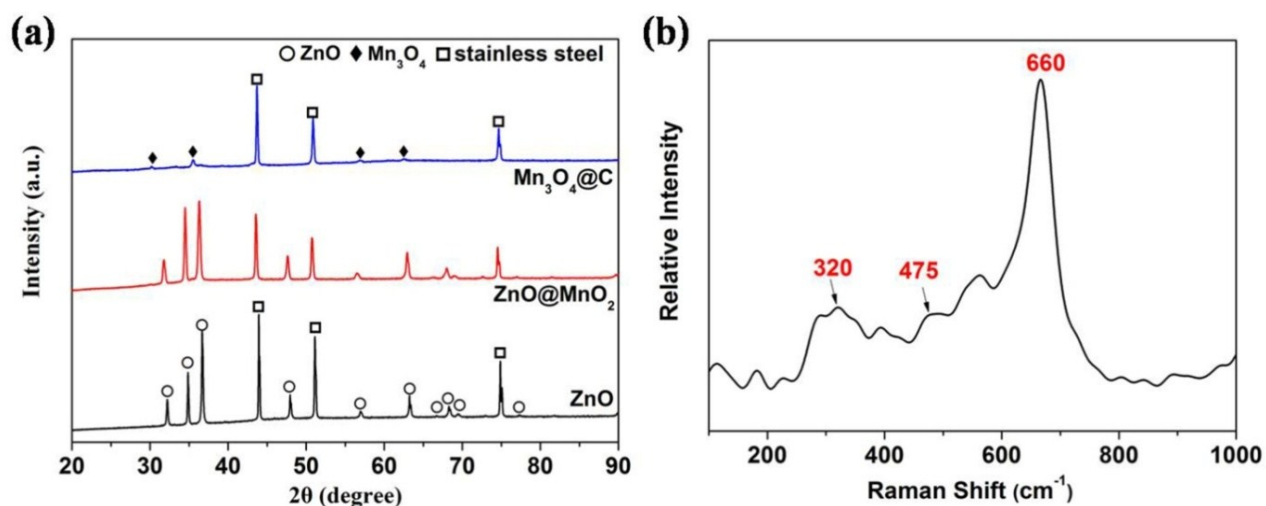

**Figure S2.** (a) XRD patterns of crystallized ZnO NRAs,  $\text{ZnO}@\text{MnO}_2$  NRAs and  $\text{Mn}_3\text{O}_4@\text{C}$  nanotube arrays on stainless steel foil. The main diffraction peaks of ZnO NRAs and  $\text{Mn}_3\text{O}_4$  nanotube arrays match well with hexagonal ZnO (JCPDS No. 36-1451) and hausmannite  $\text{Mn}_3\text{O}_4$  phase (JCPDS No. 24-0734), respectively. (b) Raman spectrum of the  $\text{Mn}_3\text{O}_4@\text{C}$  nanotube arrays.

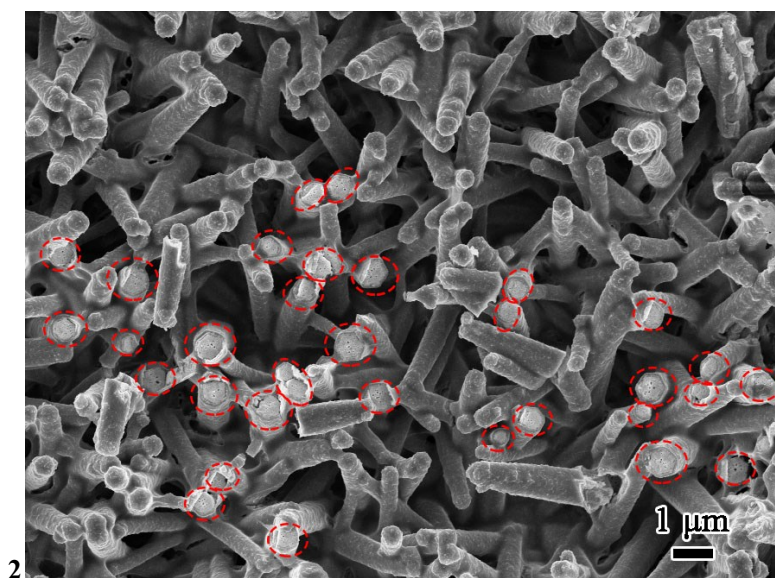

**Figure S3.** Surface SEM image of  $\text{ZnO}@\text{Mn}_3\text{O}_4@\text{C}$  NRAs on steel substrate. Some top-end of the  $\text{ZnO}@\text{Mn}_3\text{O}_4@\text{C}$  NRAs (red dash cycles) are without  $\text{Mn}_3\text{O}_4$ .

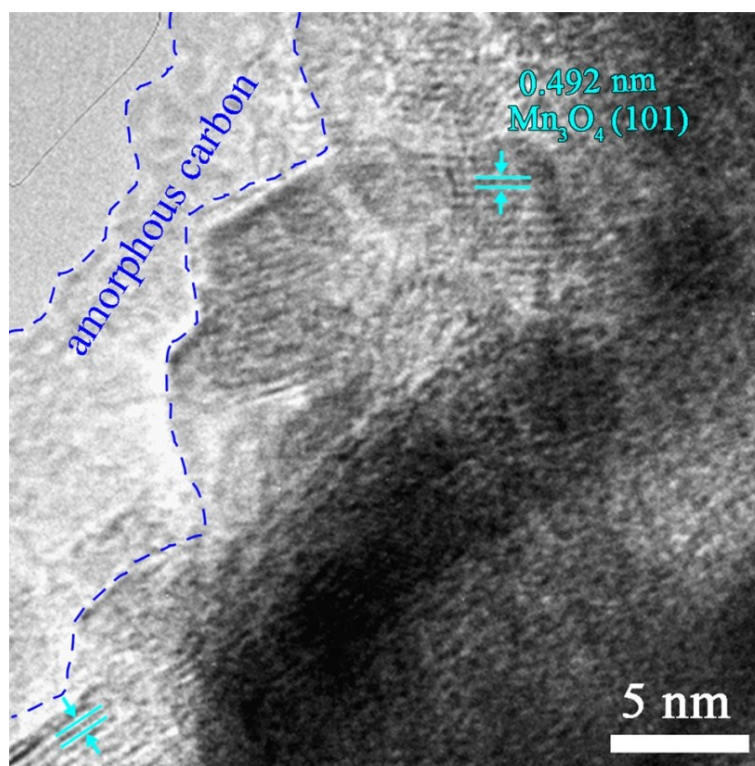

**Figure S4.** More HRTEM image of a typical Mn<sub>3</sub>O<sub>4</sub>@C nanotube. It clearly shows the amorphous carbon coated on the surface of Mn<sub>3</sub>O<sub>4</sub> nanotube.

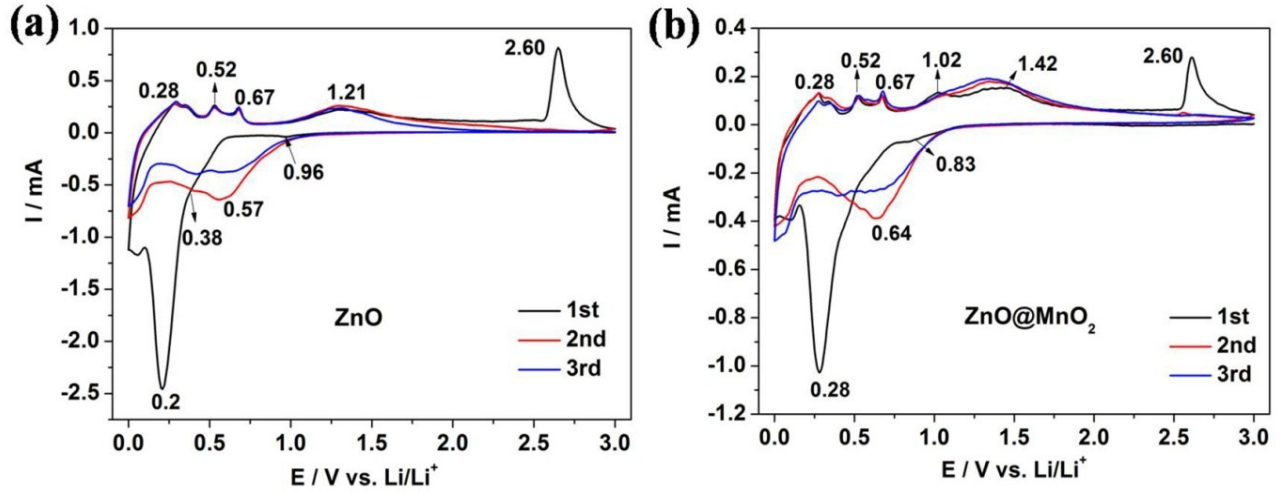

**Figure S5.** CV curves for (a) ZnO NRAs, (b) ZnO@MnO<sub>2</sub> NRAs from 0.0 to 3.0 V vs. Li<sup>+</sup>/Li at scanning rate of 0.2 mV s<sup>-1</sup>.

Figure S5a and S5b display the first three CV profiles of ZnO and ZnO@MnO<sub>2</sub> NRAs from 0.0 to 3.0 V vs. Li<sup>+</sup>/Li, respectively. In the cathodic process, the reduction peaks at 0.96 V (Figure S5a) and 0.83 V (Figure S5b) are ascribed to the irreversible formation of the SEI film.<sup>1,5</sup> The lithiation peak at 0.2V (Figure S5a) in the first cycle is corresponded to the reductive reaction of ZnO to Zn and further alloying with Li,<sup>2</sup> which is divided into two peaks located at 0.38 and 0.57 V in the followed cycles. While in Figure S5b, the lithiation peak at 0.28 V is assigned to the reduction of ZnO and MnO<sub>2</sub> and Zn further alloying with Li,<sup>1,5</sup> which shifts to 0.64V afterwards. In the anodic process, the delithiation peaks located at 0.28, 0.52, 0.67, 1.21 V in Figure S5a and peaks at 0.28, 0.52, 0.67, 1.42 V in Figure S5b are attributed to the de-alloying process of LiZn.<sup>3,4</sup> The delithiation peak at 1.02 V in figure S5b is related to the oxidation of Mn.<sup>5</sup> Furthermore, the high oxidation peak at 2.60 V in both Figure S5a and S5b is assigned to the oxidation of Zn to ZnO,<sup>2</sup> which is the featured peak of the existence of ZnO. The above related reactions could be depicted as below:

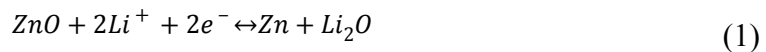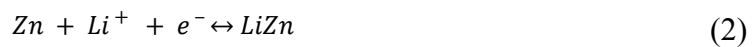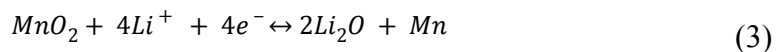

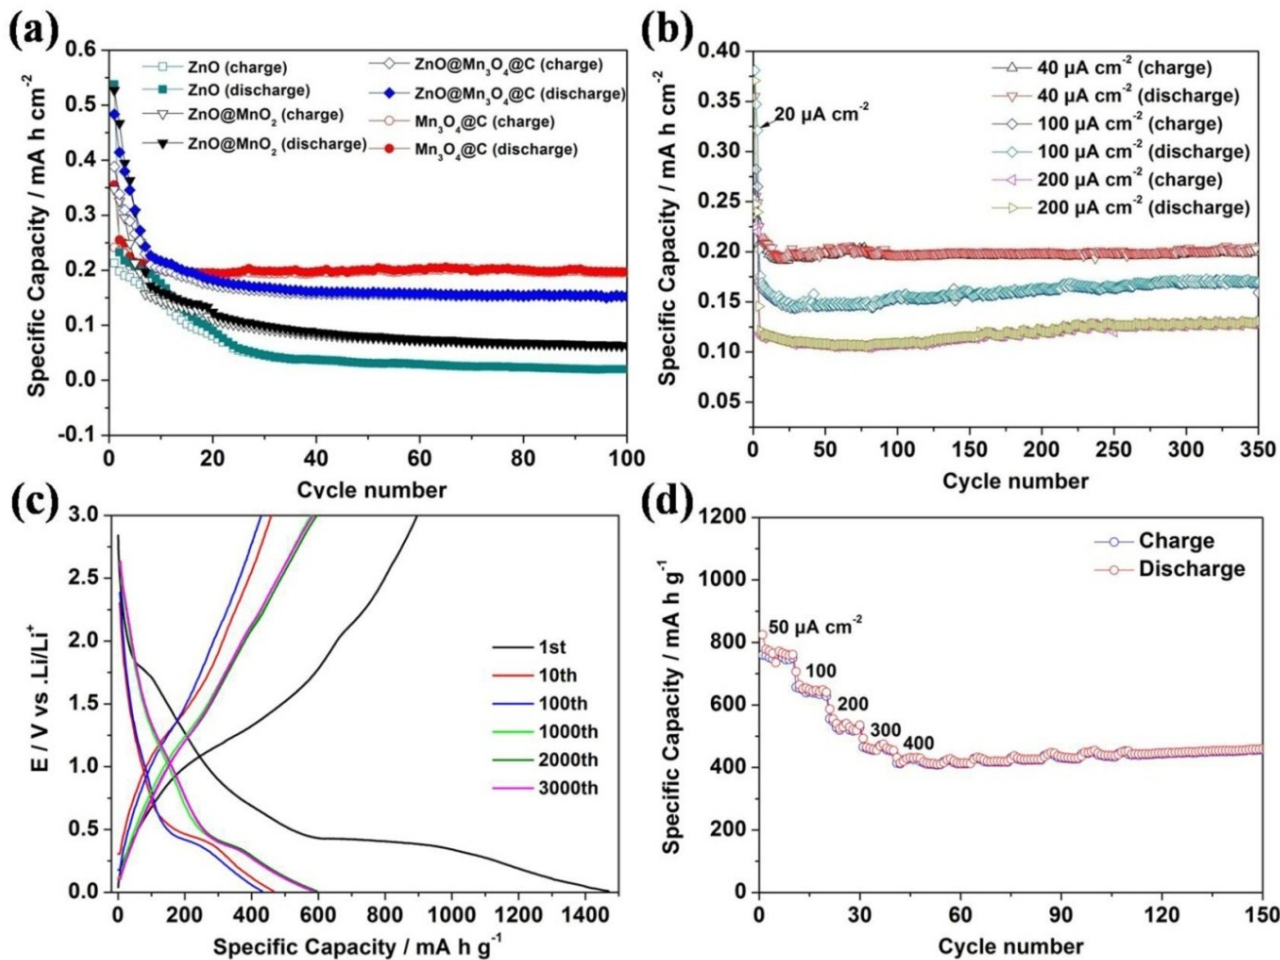

**Figure S6.** (a) Comparison of cyclic performance for ZnO, ZnO@MnO<sub>2</sub>, ZnO@Mn<sub>3</sub>O<sub>4</sub>@C, Mn<sub>3</sub>O<sub>4</sub>@C composite electrodes from 0.01 to 3.0 V vs. Li<sup>+</sup>/Li at 40 μA cm<sup>-2</sup>, the first three cycles were activated at 20 μA cm<sup>-2</sup>. (b) Cycle performance at different current rates (40, 100, 200 μA cm<sup>-2</sup>) between 0.01 and 3.0 V, the first three cycles were activated at 20 μA cm<sup>-2</sup>. (c) The discharge-charge curves of Mn<sub>3</sub>O<sub>4</sub>@C nanotube arrays at current rate of 200 μA cm<sup>-2</sup>/793 mA g<sup>-1</sup> between 0.01 and 3.0 V. (d) Rate capability of Mn<sub>3</sub>O<sub>4</sub>@C nanotube arrays electrode with a current density range from 50 to 400 μA cm<sup>-2</sup> after three activation cycles, cut off potential: 0.01–3 V vs. Li<sup>+</sup>/Li.

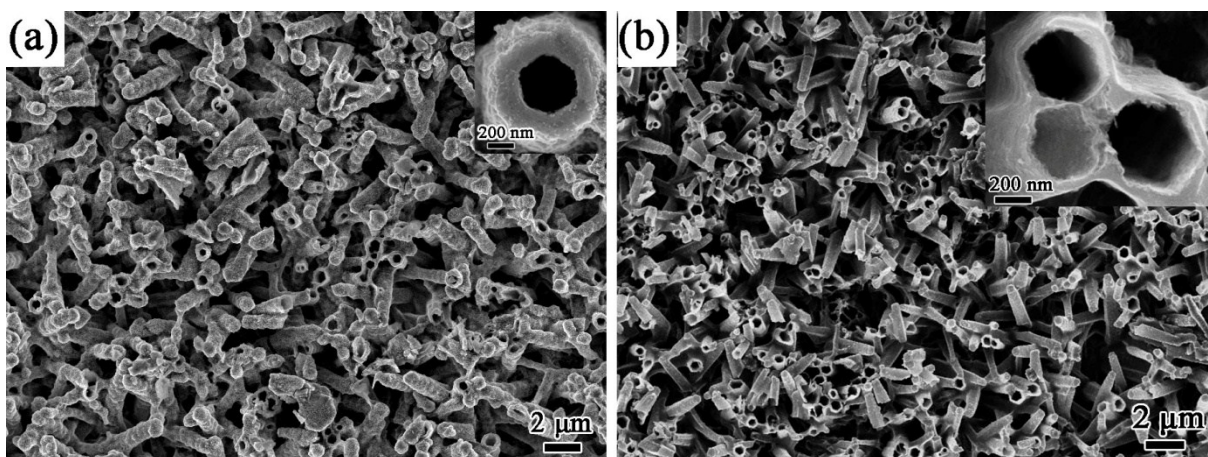

**Figure S7.** SEM micrographs of  $\text{Mn}_3\text{O}_4@\text{C}$  nanotube arrays with different loading densities: (a)  $0.48 \text{ mg cm}^{-2}$ , (b)  $0.25 \text{ mg cm}^{-2}$ . The  $\text{Mn}_3\text{O}_4@\text{C}$  with the loading density of  $0.25 \text{ mg cm}^{-2}$  (denoted as  $0.25\text{-Mn}_3\text{O}_4@\text{C}$ ) was synthesized according to the manuscript. While the  $\text{Mn}_3\text{O}_4@\text{C}$  with a higher loading density of  $0.48 \text{ mg cm}^{-2}$  (denoted as  $0.48\text{-Mn}_3\text{O}_4@\text{C}$ ) composite was prepared by prolonging the  $\text{MnO}_2$  deposition from 4h to 6h and increased the glucose concentration from 0.4 M to 0.6 M. (The weight of  $\text{Mn}_3\text{O}_4@\text{C}$  nanotube arrays on stainless steel substrate was calculated based on the mass difference of the stainless steel substrate before and after the growth of  $\text{Mn}_3\text{O}_4@\text{C}$  nanotube arrays).

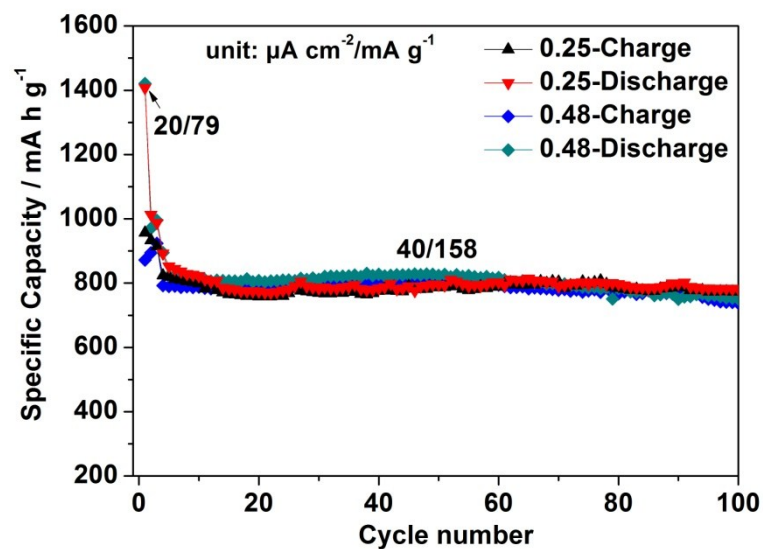

**Figure S8.** Cyclic performance of  $\text{Mn}_3\text{O}_4@\text{C}$  electrodes with loading densities of 0.25 and 0.48  $\text{mg cm}^{-2}$  (denoted as 0.25- $\text{Mn}_3\text{O}_4@\text{C}$  and 0.48- $\text{Mn}_3\text{O}_4@\text{C}$ , respectively) at  $40 \mu\text{A cm}^{-2}/158 \text{ mA g}^{-1}$  between 0.01 and 3.0 V vs.  $\text{Li}/\text{Li}^+$  after three cycles activation at  $20 \mu\text{A cm}^{-2}/79 \text{ mA g}^{-1}$ . The 0.25-Charge and 0.25-Discharge represent the cyclic performance curves of 0.25- $\text{Mn}_3\text{O}_4@\text{C}$  electrode. The 0.48-Charge and 0.48-Discharge represent the cyclic performance curves of 0.48- $\text{Mn}_3\text{O}_4@\text{C}$  electrode.



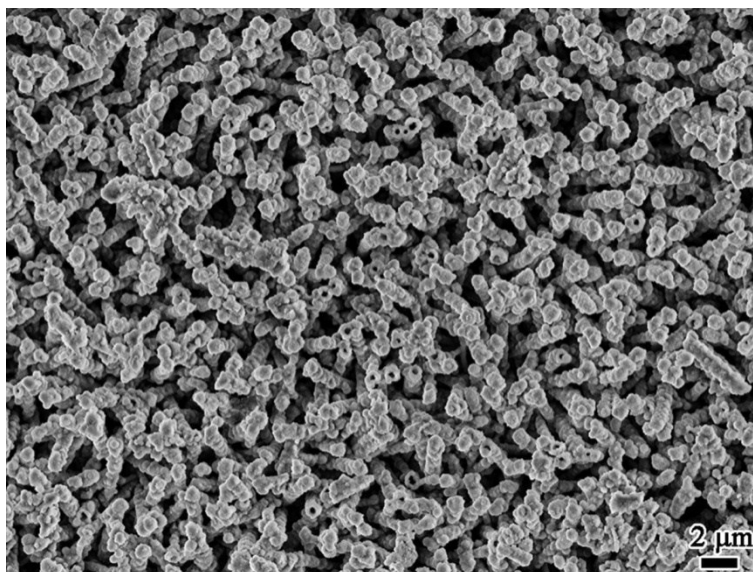

**Figure S9.** Low-resolution SEM image of Mn<sub>3</sub>O<sub>4</sub>@C nanotube arrays on substrate after 3000 cycles at 200  $\mu\text{A cm}^{-2}/793 \text{ mA g}^{-1}$ .

**Table S1.** Summary of the representative Mn<sub>3</sub>O<sub>4</sub>-based anode materials for Li-ion batteries.

| Materials                                  | Structure            | Reversible Capacity (mA h g <sup>-1</sup> )/Cycles or rate | Current density (mA g <sup>-1</sup> ) | Ref. |
|--------------------------------------------|----------------------|------------------------------------------------------------|---------------------------------------|------|
| Mn <sub>3</sub> O <sub>4</sub> -graphene   | Nanoparticles        | 600/500 <sup>th</sup>                                      | 800                                   | [18] |
|                                            |                      | 550 (rate)                                                 | 1600                                  |      |
|                                            |                      | 400 (rate)                                                 | 4000                                  |      |
| Mn <sub>3</sub> O <sub>4</sub> /graphene   | Nanorod              | 573/100 <sup>th</sup>                                      | 100                                   | [26] |
|                                            |                      | 411 (rate)                                                 | 500                                   |      |
|                                            |                      | 313 (rate)                                                 | 1000                                  |      |
|                                            |                      | 196 (rate)                                                 | 2000                                  |      |
| Mn <sub>3</sub> O <sub>4</sub> /graphene   | Nanowires            | 702/100 <sup>th</sup>                                      | 100                                   | [23] |
|                                            |                      | 550 (rate)                                                 | 500                                   |      |
|                                            |                      | 450 (rate)                                                 | 1000                                  |      |
|                                            |                      | 308 (rate)                                                 | 2000                                  |      |
| Mn <sub>3</sub> O <sub>4</sub> /graphene   | Mesoporous particles | 540/100 <sup>th</sup>                                      | 80                                    | [21] |
|                                            |                      | 460 (rate)                                                 | 400                                   |      |
|                                            |                      | 320 (rate)                                                 | 800                                   |      |
|                                            |                      | 180 (rate)                                                 | 1600                                  |      |
| Mn <sub>3</sub> O <sub>4</sub> /graphene   | Nanobead             | 1100/240 <sup>th</sup>                                     | 100                                   | [36] |
|                                            |                      | 600 (rate)                                                 | 200                                   |      |
|                                            |                      | 500 (rate)                                                 | 300                                   |      |
|                                            |                      | 415 (rate)                                                 | 500                                   |      |
|                                            |                      | 320 (rate)                                                 | 1000                                  |      |
| Mn <sub>3</sub> O <sub>4</sub> /graphene   | Nanoparticle         | 500/40 <sup>th</sup>                                       | 60                                    | [22] |
|                                            |                      | 390 (rate)                                                 | 250                                   |      |
|                                            |                      | 200 (rate)                                                 | 1500                                  |      |
| Mn <sub>3</sub> O <sub>4</sub> /MWCNTs     | Nanoparticles        | 592/50 <sup>th</sup>                                       | 100                                   | [17] |
|                                            |                      | 585 (rate)                                                 | 250                                   |      |
|                                            |                      | 500 (rate)                                                 | 500                                   |      |
|                                            |                      | 387 (rate)                                                 | 1000                                  |      |
| Mn <sub>3</sub> O <sub>4</sub> /CNT        | Nanoparticle         | 380/100 <sup>th</sup>                                      | 936                                   | [29] |
|                                            |                      | 490 (rate)                                                 | 468                                   |      |
|                                            |                      | 460 (rate)                                                 | 936                                   |      |
|                                            |                      | 440 (rate)                                                 | 1872                                  |      |
|                                            |                      | 400 (rate)                                                 | 4680                                  |      |
| Mn <sub>3</sub> O <sub>4</sub> @C          | Nanorod              | 473/50 <sup>th</sup>                                       | 40                                    | [12] |
| Mn <sub>3</sub> O <sub>4</sub> /reduced GO | Nanoparticles        | 730/40 <sup>th</sup>                                       | 400                                   | [19] |
|                                            |                      | 390 (rate)                                                 | 1600                                  |      |

|                                                   |                          |                                                |             |          |
|---------------------------------------------------|--------------------------|------------------------------------------------|-------------|----------|
| Mn <sub>3</sub> O <sub>4</sub> /mesoporous carbon | Nanoparticle             | 780/50 <sup>th</sup>                           | 100         | [20]     |
| Mn <sub>3</sub> O <sub>4</sub>                    | Octahedra                | 746/300 <sup>th</sup><br>620/300 <sup>th</sup> | 100<br>300  | [9]      |
| Mn <sub>3</sub> O <sub>4</sub>                    | Mesoporous nanotubes     | 641/100 <sup>th</sup><br>525 (rate)            | 500<br>1000 | [16]     |
| Mn <sub>3</sub> O <sub>4</sub>                    | Spongelike nanoparticles | 800/40 <sup>th</sup>                           | 30          | [10]     |
| Mn <sub>3</sub> O <sub>4</sub> @C                 | Nanotube arrays          | 785/350 <sup>th</sup>                          | 158         | Our work |
|                                                   |                          | 635/350 <sup>th</sup>                          | 396         |          |
|                                                   |                          | 590/3000 <sup>th</sup>                         | 793         |          |
|                                                   |                          | 460 (rate)                                     | 1189        |          |
|                                                   |                          | 420 (rate)                                     | 1586        |          |
|                                                   |                          | 400 (rate)                                     | 1982        |          |
|                                                   |                          | 375 (rate)                                     | 2380        |          |

## Reference

- 1 G. Gachot, S. Grugeon, M. Armand, S. Pilard, P. Guenot, J.-M. Tarascon and S. Laruelle, *J. Power Sources*, 2008, **178**, 409-421.
- 2 X. Huang, X. Xia, Y. Yuan and F. Zhou, *Electrochim. Acta*, 2011, **56**, 4960-4965.
- 3 F. Belliard and J. Irvine, *J. Power Sources*, 2001, **97**, 219-222.
- 4 J. Liu, Y. Li, X. Huang, G. Li and Z. Li, *Adv. Funct. Mater.*, 2008, **18**, 1448-1458.
- 5 J. Fang, Y. Yuan, L. Wang, H. Ni, H. Zhu, J. Yang, J. Gui, Y. Chen and S. Guo, *Electrochim. Acta*, 2013, **112**, 364-370.
